# Supplementary material
Source: publisher site journal article supplement (https://www.dovepress.com/article/241956)
Supplement: Supplementary file 1 [file get_supplementary_file.php]

**
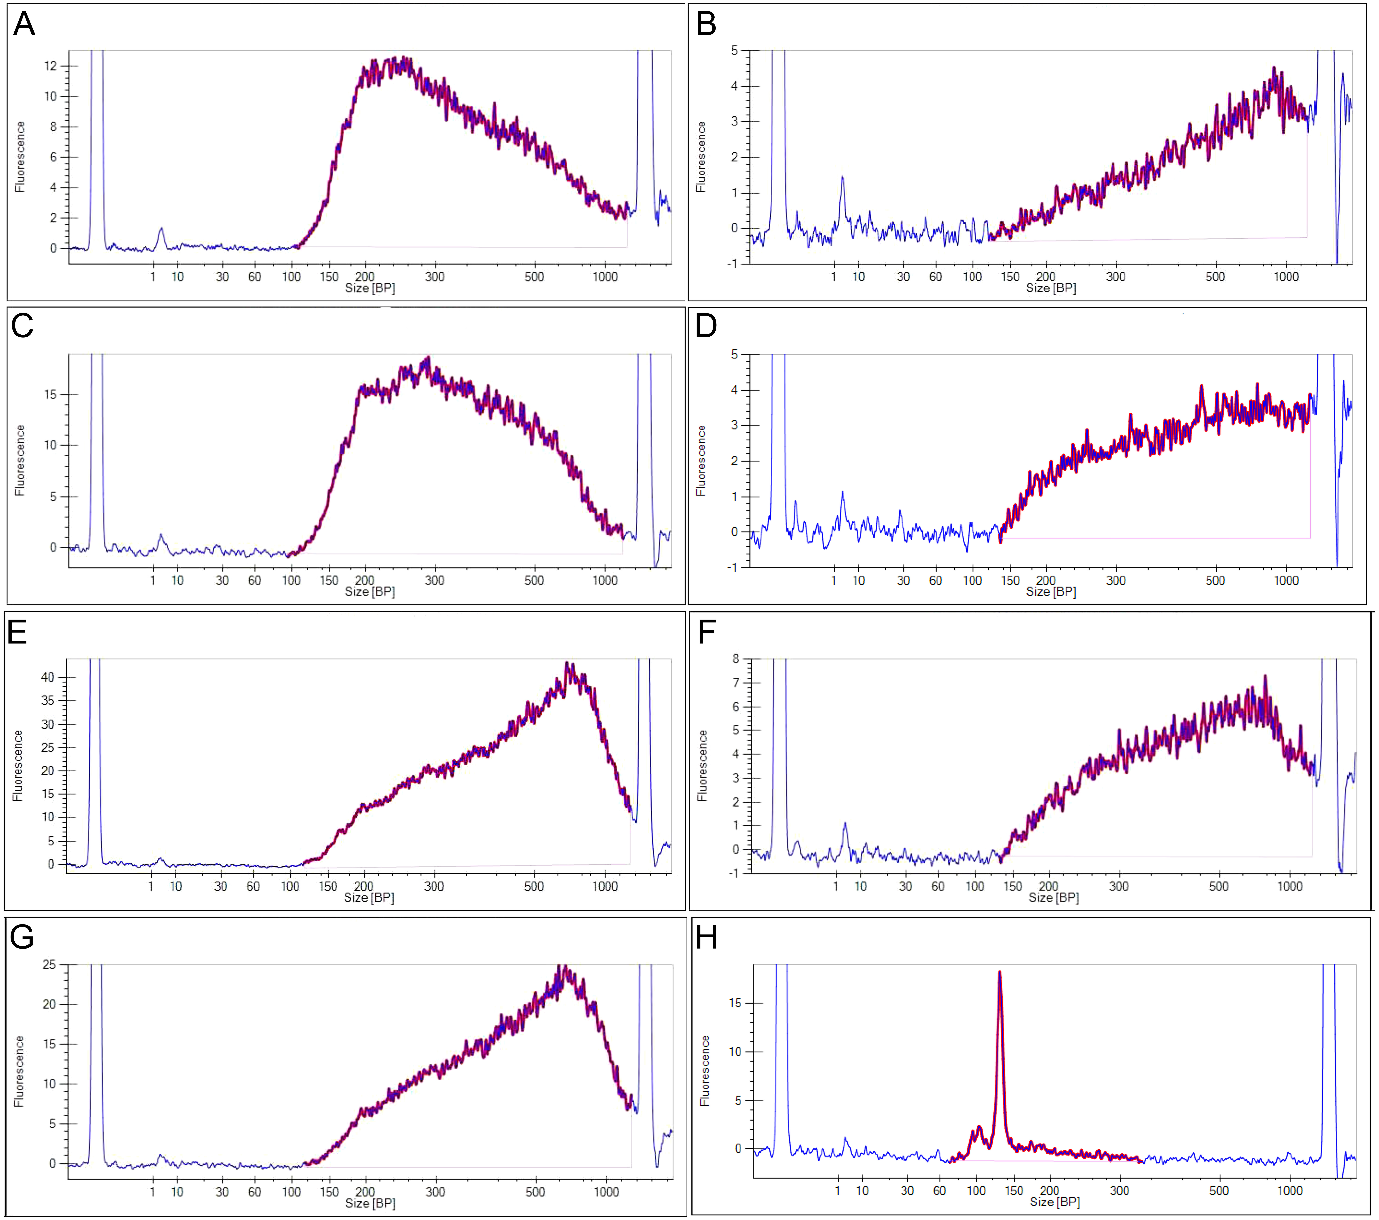
Figure S1**

**
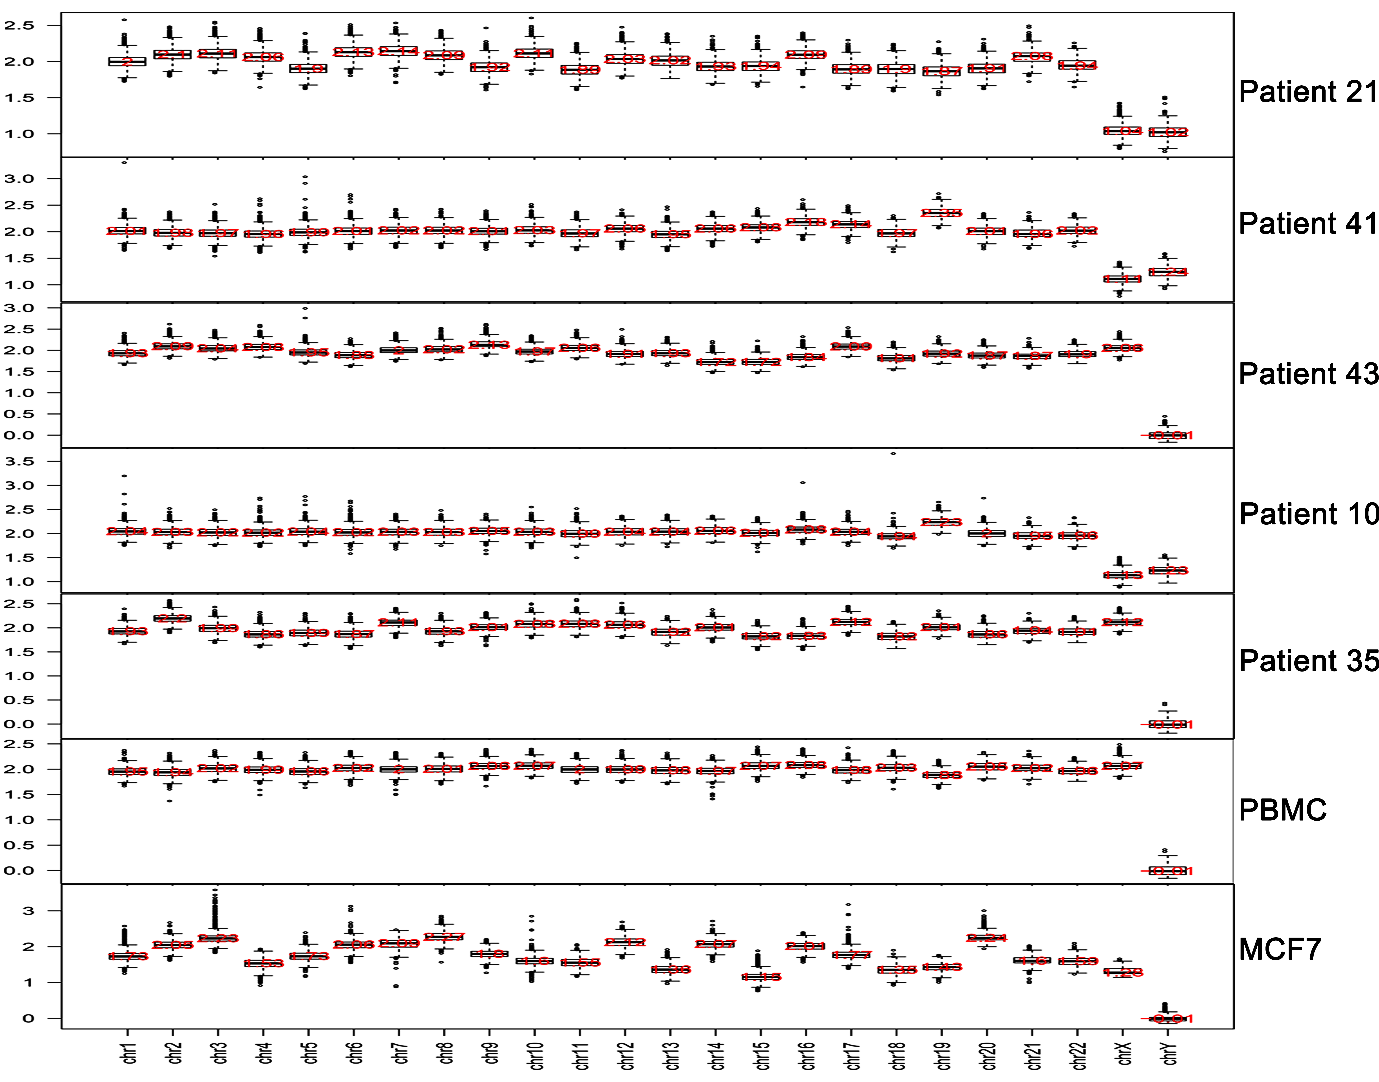
**

**Figure S2**

**Table S1** Clinical information

| Patient | Gender | Pathological type | TNM | CTCs | CTCs PD-L1 | NGS |
| --- | --- | --- | --- | --- | --- | --- |
| 1 | Male | Mycotic infection, fibrotic ground glass nodules | / | 0 | 0 | No |
| 2 | Male | Tuberculosis | / | 0 | 0 | No |
| 3 | Male | Tuberculosis | / | 0 | 0 | No |
| 4 | Female | Bronchogenic cysts | / | 0 | 0 | No |
| 5 | Female | Atypical adenomatous hyperplasia | / | 0 | 0 | No |
| 6 | Male | Hamartoma | / | 0 | 0 | No |
| 7 | Male | Inflammation accompanied by carbon deposition | / | 0 | 0 | No |
| 8 | Male | Inflammation accompanied by carbon deposition | / | 0 | 0 | No |
| 9 | Male | Fibrotic ground-glass nodules accompanied by carbon deposition | / | 0 | 0 | No |
| 10 | Male | Inflammation, fibrotic nodules | / | 1 | 1 | Yes |
| 11 | Female | Adenocarcinoma *in situ* | TisN0M0 | 0 | 0 | No |
| 12 | Female | Adenocarcinoma *in situ* | TisN0M0 | 2 | 0 | No |
| 13 | Male | Adenocarcinoma *in situ* | TisN0M0 | 1 | 1 | No |
| 14 | Female | Adenocarcinoma *in situ* | TisN0M0 | 0 | 0 | No |
| 15 | Female | Adenocarcinoma *in situ* | TisN0M0 | 0 | 0 | No |
| 16 | Male | Adenocarcinoma *in situ* | TisN0M0 | 0 | 0 | No |
| 17 | Female | Adenocarcinoma *in situ* | TisN0M0 | 1 | 0 | No |
| 18 | Male | Adenocarcinoma *in situ* | TisN0M0 | 1 | 0 | No |
| 19 | Female | Adenocarcinoma *in situ* | TisN0M0 | 0 | 0 | No |
| 20 | Female | Adenocarcinoma *in situ* | TisN0M0 | 0 | 0 | No |
| 21 | Male | Adenocarcinoma *in situ* | TisN0M0 | 2 | 1 | Yes |
| 22 | Male | Minimally invasive adenocarcinoma | T1N0M0 | 1 | 1 | No |
| 23 | Female | Minimally invasive adenocarcinoma | T1N0M0 | 1 | 1 | No |
| 24 | Male | Minimally invasive adenocarcinoma, Adenocarcinoma *in situ* | T1N0M0 | 0 | 0 | No |
| 25 | Male | Minimally invasive adenocarcinoma | T1N0M0 | 2 | 2 | No |
| 26 | Female | Minimally invasive adenocarcinoma | T1N0M0 | 0 | 0 | No |
| 27 | Female | Minimally invasive adenocarcinoma | T1N0M0 | 1 | 0 | No |
| 28 | Female | Minimally invasive adenocarcinoma | T1N0M0 | 0 | 0 | No |
| 29 | Female | Minimally invasive adenocarcinoma | T1N0M0 | 1 | 1 | No |
| 30 | Female | Adenocarcinoma *in situ*, minimally invasive adenocarcinoma | T1N0M0 | 0 | 0 | No |
| 31 | Male | Minimally invasive adenocarcinoma | T1N0M0 | 1 | 0 | No |
| 32 | Female | Minimally invasive adenocarcinoma | T1N0M0 | 0 | 0 | No |
| 33 | Male | Minimally invasive adenocarcinoma | T1N0M0 | 0 | 0 | No |
| 34 | Male | Minimally invasive adenocarcinoma | T1N0M0 | 0 | 0 | No |
| 35 | Male | Minimally invasive adenocarcinoma | T1N0M0 | 2 | 2 | Yes |
| 36 | Female | Invasive adenocarcinoma | T1N0M0 | 2 | 2 | No |
| 37 | Male | Invasive adenocarcinoma | T1N0M0 | 3 | 0 | No |
| 38 | Female | Invasive adenocarcinoma (right upper lobe) | T1N0M0 | 1 | 0 | No |
| 39 | Male | Invasive adenocarcinoma | T1N0M0 | 0 | 0 | No |
| 40 | Female | Invasive adenocarcinoma | T1N0M0 | 0 | 0 | No |
| 41 | Male | Invasive adenocarcinoma, adenocarcinoma *in situ* | T1N0M0 | 1 | 0 | Yes |
| 42 | Female | Invasive adenocarcinoma | T1N0M0 | 0 | 0 | No |
| 43 | Female | Invasive adenocarcinoma | T1N0M0 | 1 | 1 | Yes |
| 44 | Male | Invasive adenocarcinoma | T1N0M0 | 1 | 1 | No |

CTCs indicate Circulating Tumor Cells

NGS indicates Next Generation Sequencing

**Table S1** Assessment of whole-genome amplification results of the CTCs

| Sample number | Sample name | Concentration  (**ng/μL**) | Volume  (**μL**) | Total amount  (**ng**) | Peak status |
| --- | --- | --- | --- | --- | --- |
| 1 | P21 | 39.8 | 40 | 1592 | Normal peak |
| 2 | P41 | 33.8 | 40 | 1352 | Normal peak |
| 3 | P43 | 76.4 | 40 | 3056 | Normal peak |
| 4 | P10 | 21.4 | 40 | 856 | Normal peak |
| 5 | P35 | 118 | 40 | 4720 | Normal peak |
| 6 | PBMC | 38.4 | 40 | 1536 | Normal peak |
| 7 | MCF7 | 83.2 | 40 | 3328 | Normal peak |
| 8 | NCT | 5.1 | 40 | 3328 | No target peak |

CTCs indicate Circulating Tumor Cells

PBMC indicates Peripheral Blood Mononuclear Cell

NCT indicates No Template Control
